# Supplementary material for: Synthesis of Cu2O coated Cu nanoparticles and their successful applications to Ullmann-type amination coupling reactions of aryl chloridesElectronic supplementary information (ESI) available: detailed experimental procedure for the catalytic reactions. See http://www.rsc.org/suppdata/cc/b3/b316147a/
Source: Royal Society of Chemistry journal article supplement (doi:10.1039/b316147a), 2004-01-01
Supplement: b316147a.doc [file b316147a.doc]

Electronic Supplementary Information for

**Synthesis of Cu2O coated Cu nanoparticles and their successful applications to Ullmann-type amination coupling reactions of aryl chlorides**

**Seung Uk Son, In Kyu Park, Jongnam Park, and Taeghwan Hyeon***

**Detailed Experimental Procedure for the Catalytic Reactions**

The addition of 50 mL ethanol to reaction mixture caused precipitation of Cu nanoparticles which were isolated by centrifuging. The Cu nanoparticles redispersed in toluene were kept in air for 2 days and used as catalyst. For the catalytic reactions, we dispersed 40 mg of Cu2O coated Cu nanoparticles in 5 ml toluene because the hydrophobic nanoparticles were not well-dispersed in DMSO. The appropriate amount of the toluene-dispersed nanoparticles was added to the reaction mixture in DMSO. The thin toluene layer containing the nanoparticles on the top of the DMSO reaction mixture became miscible when the reaction temperature was increased.

The experimental procedure for the isolation of the product is as follows. After the reaction, the reaction mixture was cooled down to room temperature, and was poured into saturated 20 ml aqueous NH4Cl solution. The product was extracted three times with 20 ml dichloromethane and dried using MgSO4. The product was isolated by flash column chromatography using a diethylether and acetone mixture as an eluent.
